# Supplementary material
Source: PubMed Central journal article supplement (PMC7526828)

**Supplementary Table.** EUCAST modal MEC/MIC (range) (mg/L) for manogepix (MGX) and comparators.

| Species (N)                   | EUCAST MEC/MICs presented as mode <sup>a</sup> (range) (mg/L) |                  |             |                  |                  |                  |
|-------------------------------|---------------------------------------------------------------|------------------|-------------|------------------|------------------|------------------|
|                               | MGX                                                           | AMB              | ISA         | VRC <sup>b</sup> | ITR <sup>b</sup> | PRC <sup>b</sup> |
| <i>A. flavus</i> (8)          | (0.016-0.06)                                                  | (0.5-4)          | (0.5-2)     | (0.5-1)          | (0.125-0.5)      | (0.06-0.25)      |
| <i>A. fumigatus</i> all (121) | 0.06 (0.016-0.125)                                            | 0.5 (0.25-1)     | 1 (0.25-16) | 0.5 (0.25-4)     | 0.25 (0.125->16) | 0.125 (0.03->4)  |
| Itraconazole R (10)           | 0.06 (0.03-0.125)                                             | 0.5 (0.25-1)     | 1 (0.25-16) | 0.5/4 (0.25-4)   | >16 (4->16)      | 2/>4 (0.5->4)    |
| <i>A. nidulans</i> (2)        | (0.03)                                                        | (0.25-0.5)       | (0.25)      | (0.25)           | (0.125-0.25)     | (0.06-0.125)     |
| <i>A. niger</i> (18)          | 0.03 (0.008-0.06)                                             | 0.25 (0.125-0.5) | 8 (1-8)     | 2 (0.5-4)        | 1 (0.5->16)      | 0.25 (0.125-0.5) |
| <i>A. terreus</i> (6)         | (0.016-0.125)                                                 | (1-4)            | (0.5-2)     | (0.5-2)          | (0.06-0.5)       | (0.03-0.25)      |
| <i>F. dimerum</i> (1)         | (0.06)                                                        | (1)              | (>16)       | (8)              | (>16)            | (>4)             |
| <i>F. solani</i> (1)          | (0.03)                                                        | (>4)             | (>16)       | (8)              | (4)              | (>4)             |
| <i>T. interdigitale</i> (1)   | (>0.5)                                                        | (0.5)            | (0.25)      | (1)              | (0.06)           | (0.008)          |
| <i>L. ramosa</i> (1)          | (>0.5)                                                        | (0.25)           | (4)         | (>16)            | (2)              | (1)              |
| <i>R. pusillus</i> (2)        | (>0.5)                                                        | (0.06)           | (4)         | (>16)            | (0.25-0.5)       | (0.25-0.5)       |

<sup>a</sup> the modal MIC was not determined for species with  $\leq 10$  isolates. <sup>b</sup> Eighty-six *A. fumigatus* isolates were classified as azole susceptible using E.Def 10.1 azole agar screening plates, hence the MIC values for voriconazole, itraconazole and posaconazole were based upon the MICs for the remaining 35 isolates.

**Fig. 1.** Colorimetric MIC determination of manogepix against *A. fumigatus* and *A. flavus*. Metabolic activity was determined after 24/48 h incubation of the microtitre plates inoculated with the standard EUCAST inoculum and 3 ten-fold dilutions hereof followed by 1 h incubation with XTT/MEN.

a) Metabolic activity after 24 h growth

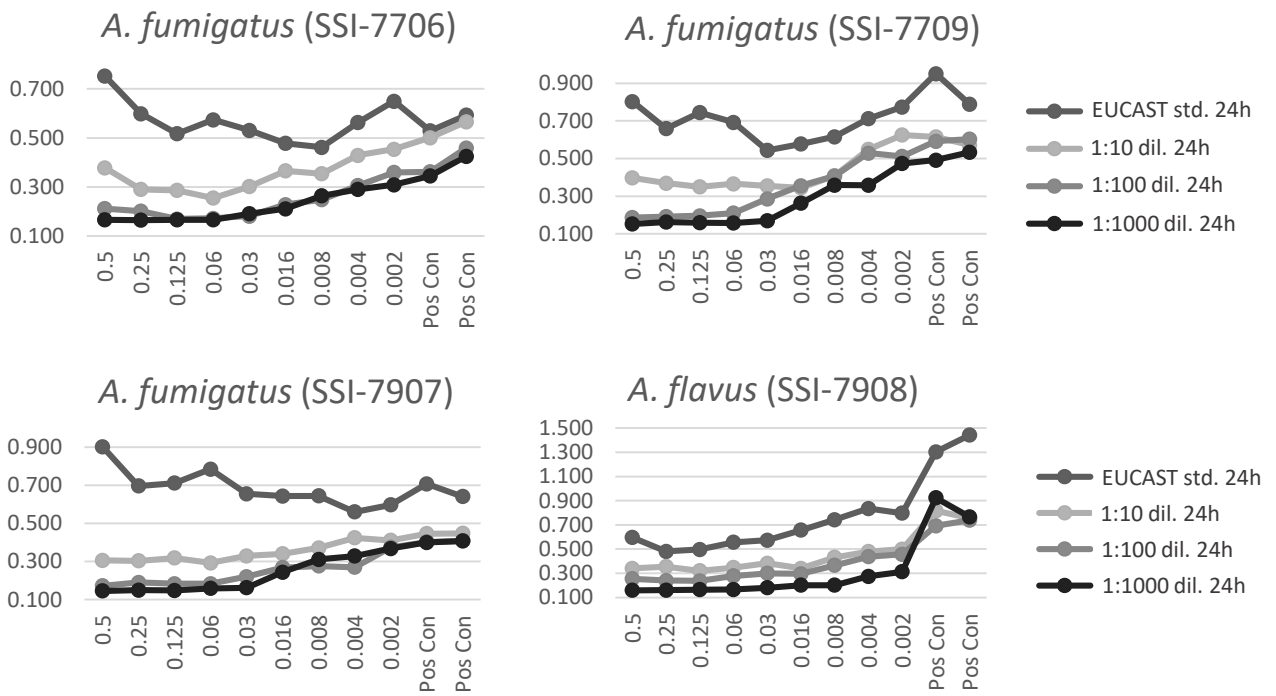

a) Metabolic activity after 48 h growth

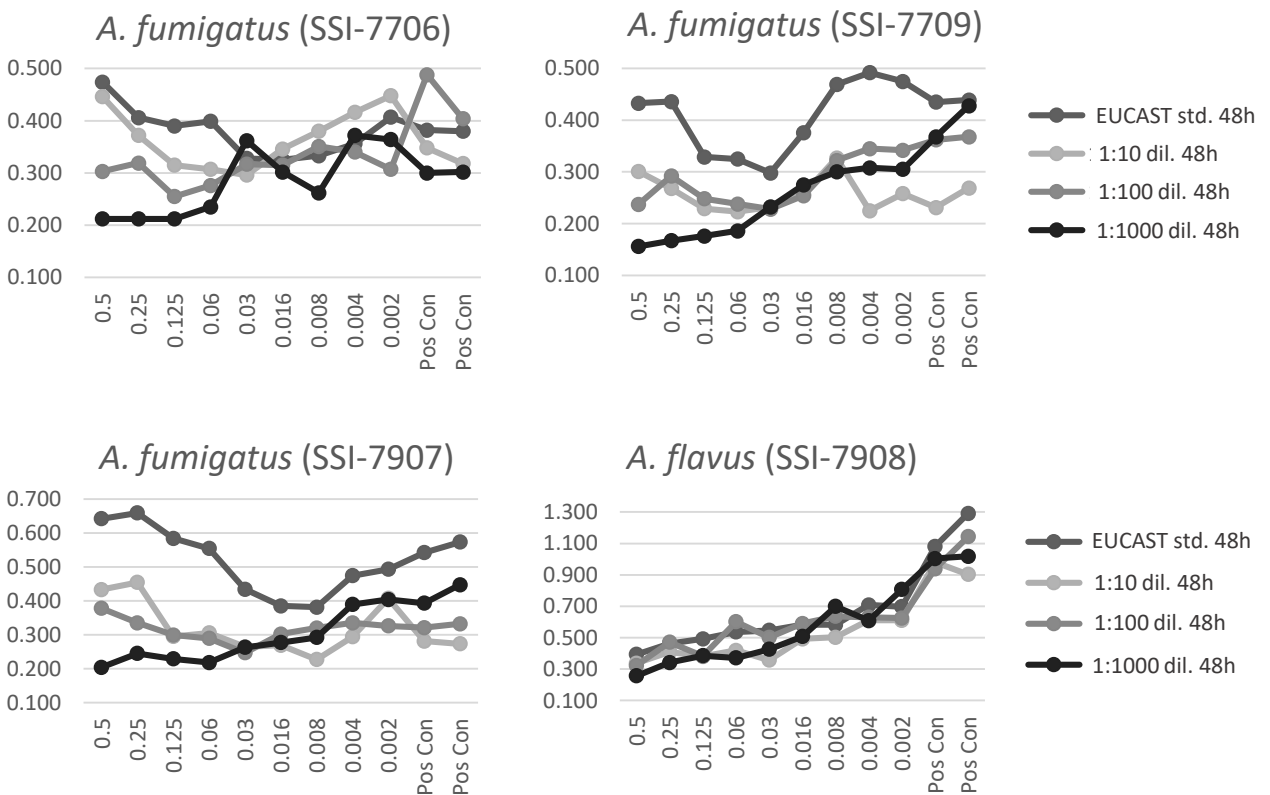

**Fig. 2.** Colorimetric MIC determination of manogepix against *A. fumigatus* and *A. flavus*. Metabolic activity was determined after 24/48 h incubation of the microtitre plates inoculated with the standard EUCAST inoculum and 3 ten-fold dilutions hereof followed by 2 h incubation with XTT/MEN.

a) Metabolic activity after 24 h growth

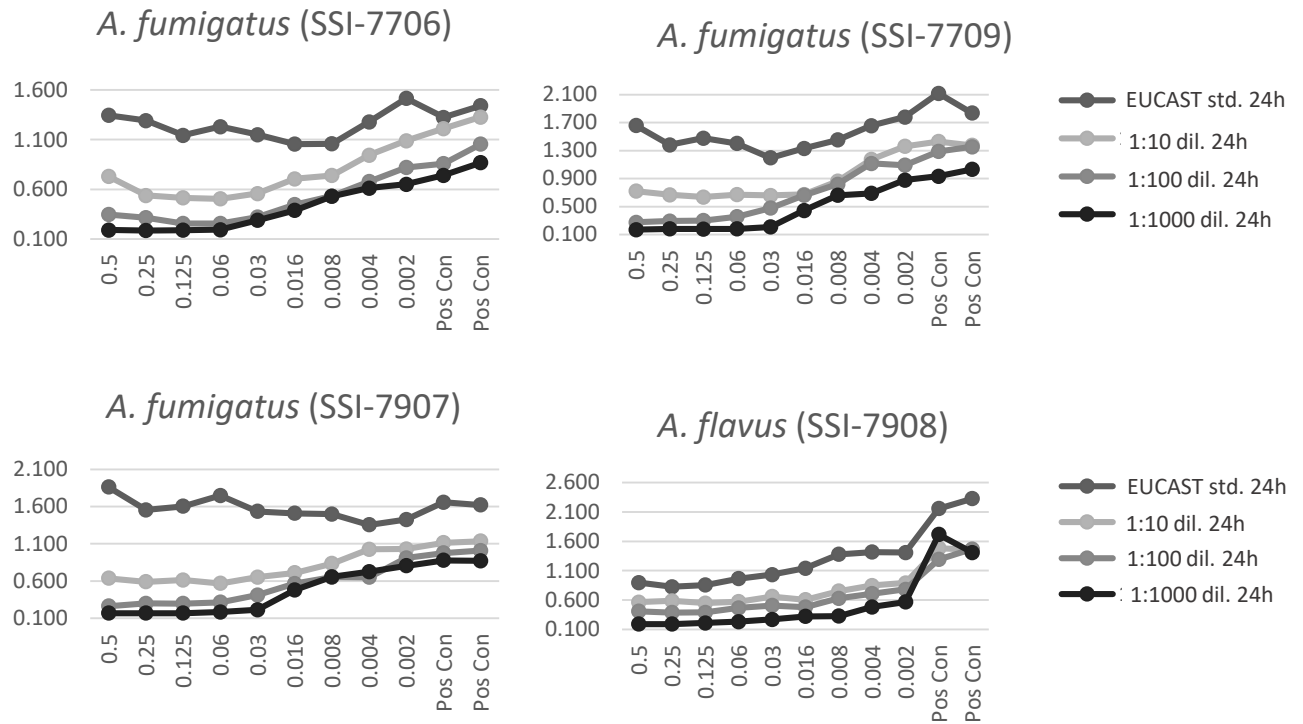

a) Metabolic activity after 48 h growth

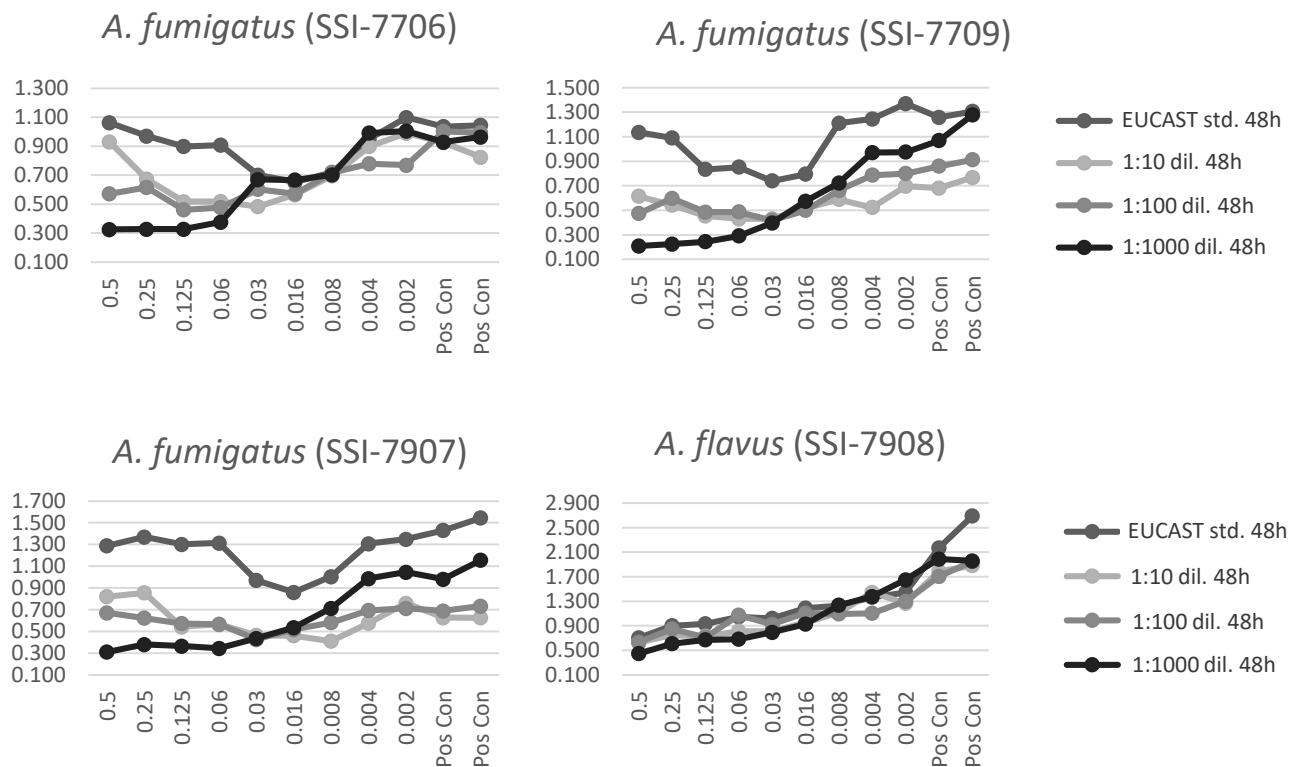

**Fig. 3.** Colorimetric MIC determination of manogepix against *A. fumigatus* and *A. flavus*. Metabolic activity was determined after 24/48 h incubation of the microtitre plates inoculated with the standard EUCAST inoculum and 3 ten-fold dilutions hereof followed by 3 h incubation with XTT/MEN.

a) Metabolic activity after 24 h growth

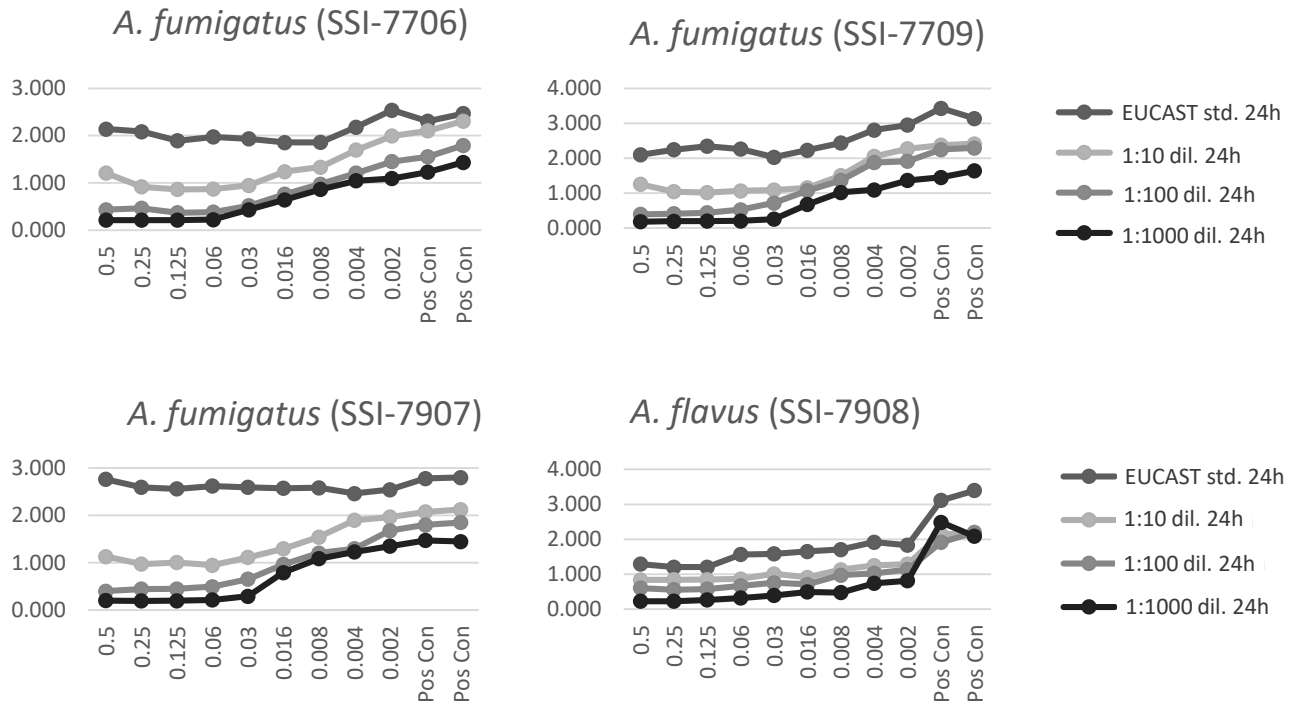

a) Metabolic activity after 48 h growth

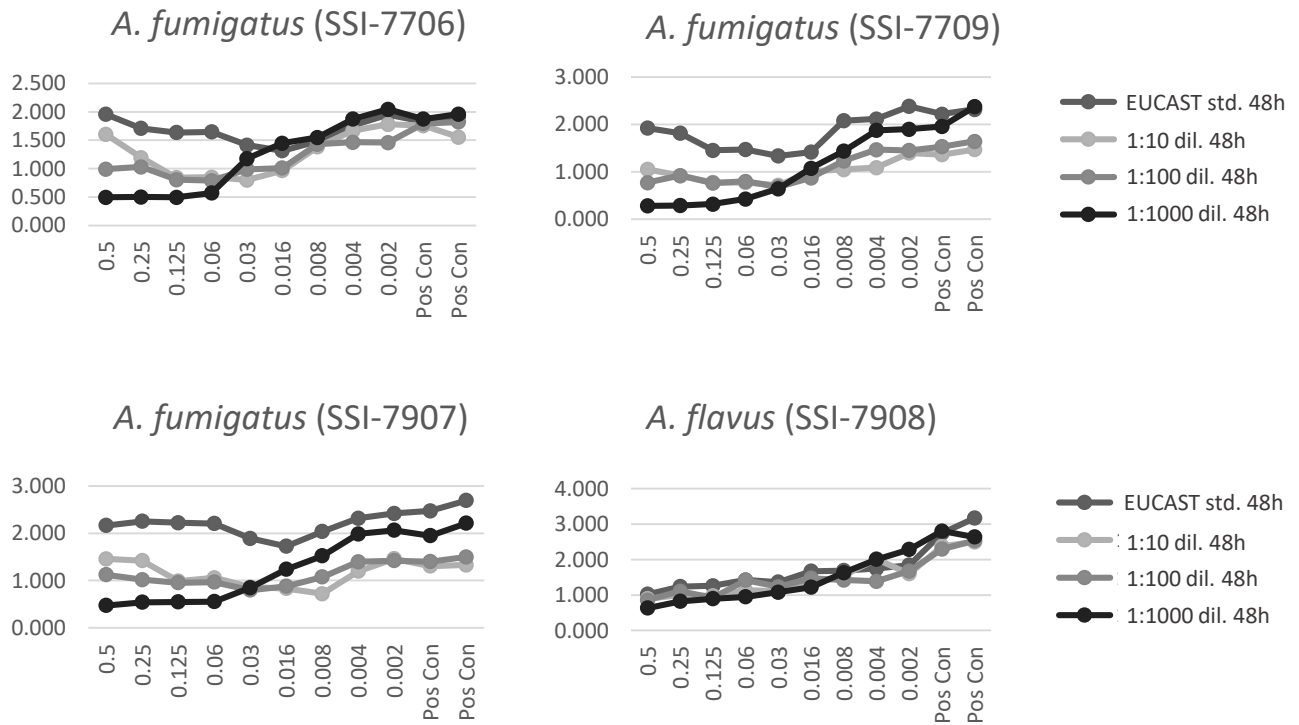

Supplement: AAC.00730-20-s0001.pdf [file AAC.00730-20-s0001.pdf]
